# Supplementary material for: In Vivo Application of CRISPR/Cas9 Revealed Implication of Foxa1 and Foxp1 in Prostate Cancer Proliferation and Epithelial Plasticity
Source: MDPI journal article supplement (doi:10.3390/cancers14184381), 2022-09-08
Supplement: s1 [file s1]

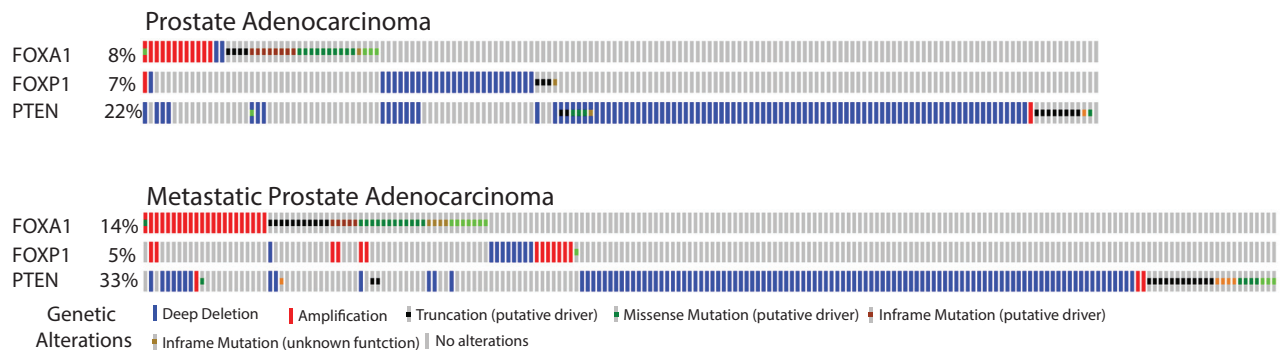

**Figure S1: Loss of PTEN co-occurrence with loss of FOXP1 in primary prostate adenocarcinoma.**

The mutation frequency of PTEN, FOXA1 and FOXP1 in primary PCa were assessed in a TCGA data set containing 501 samples (Firehose Legacy). The mutations burden in metastatic prostate cancer were assessed in SU2C/PCF Dream team data set containing 444 samples. PTEN co-occurrence with loss of FOXP1 in primary prostate adenocarcinoma was predicted ( $p=0,028$ ). Data were generated from cBioPortal.org.

A

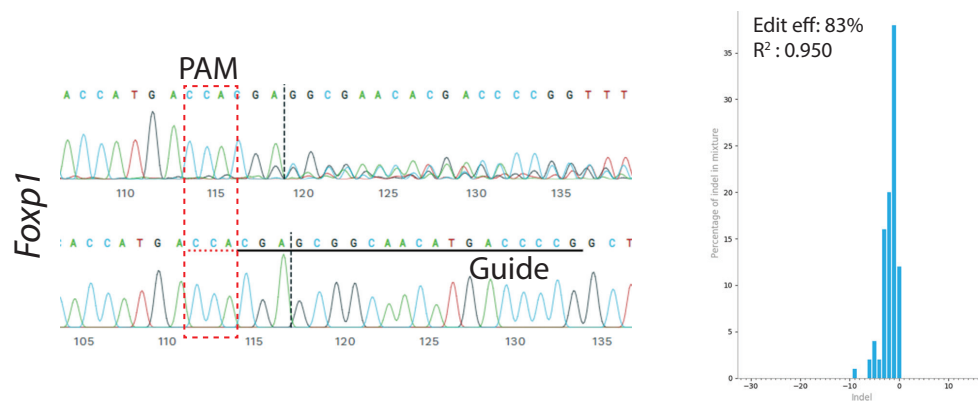

B

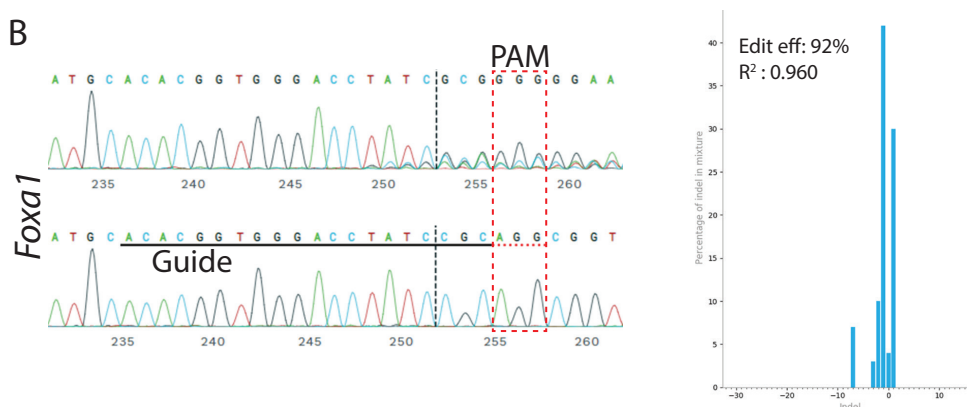

**Figure S2: Guide efficiency for Foxa1 and Foxp1**

MEF cells transfected with plasmid containing sgRNA's for *Foxp1* (A) and *Foxa1* (B) were assessed for Indel formation by Synthego ICE software.

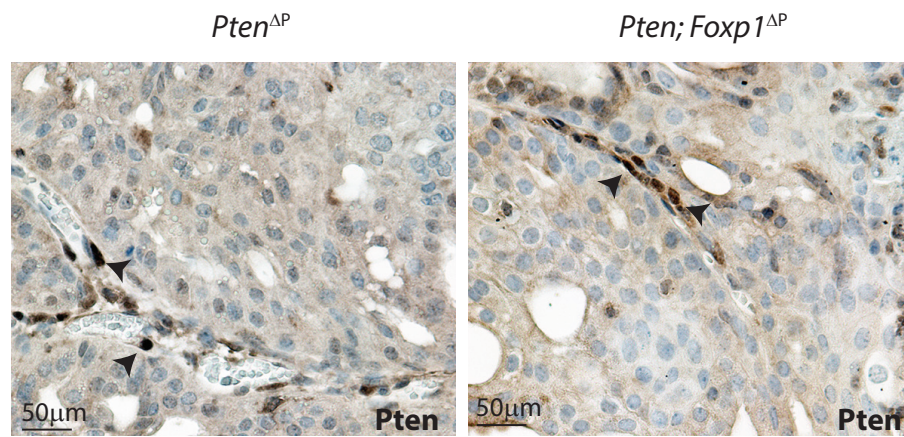

**Figure S3: Loss of Pten in the prostatic tissues.**

Paraffin sections from the prostates 4 months after virus delivery were stained with an antibody to Pten (brown stain). Cell marks with arrowheads shows Pten expression (n=3).

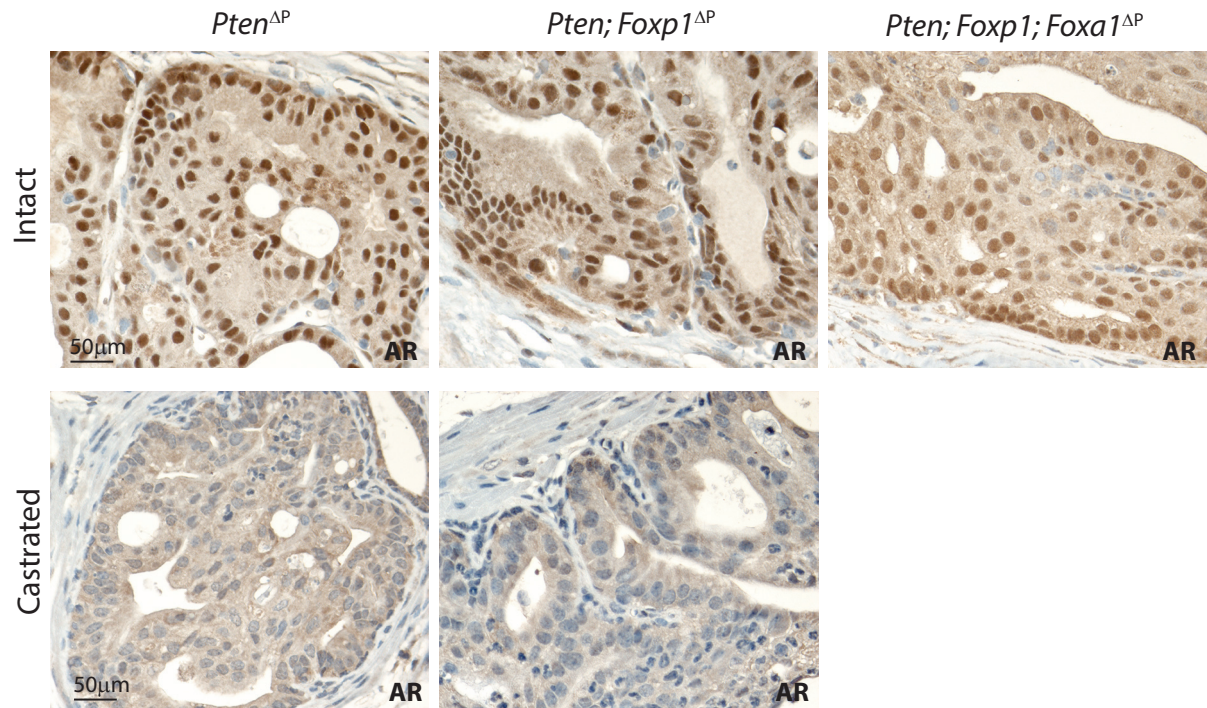

**Figure S4: Normal localization of the androgen receptor in the prostatic cells.**

Paraffin sections from the prostates 4 months after virus delivery were stained with an antibody to androgen receptor (AR) (brown stain) (n=3). A subset of mice was castrated one month before the experiments were terminated.

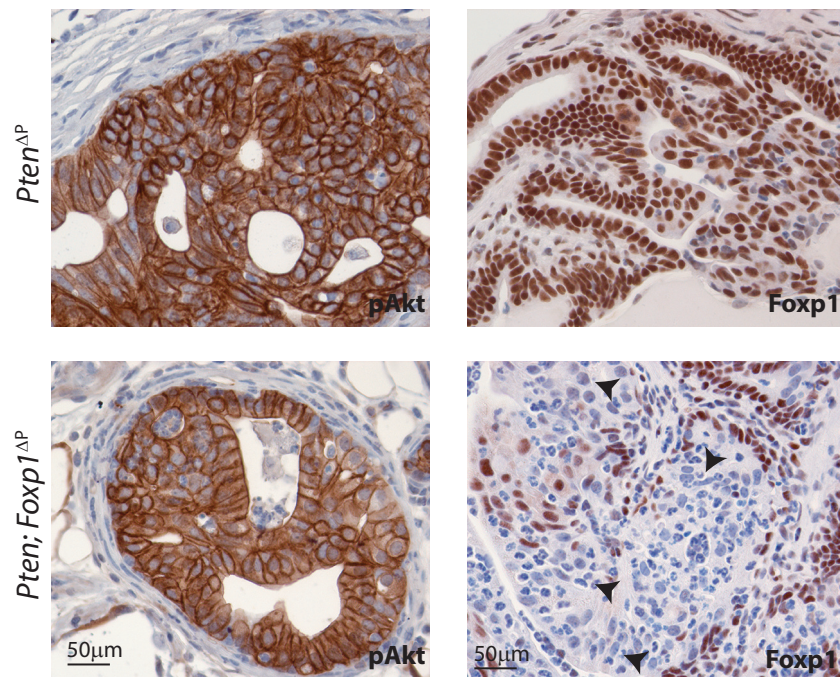

**Figure S5: Castrated prostatic tissues contained loss of Foxp1 and increases p-Akt in *Pten; Foxp1* deficient mice.** Mice deficient for *Pten* or *Pten; Foxp1* in the prostatic tissues underwent castration one month before samples were collected. Tissue sections were stained for p-Akt and Foxp1 (brown stain) (n=5).

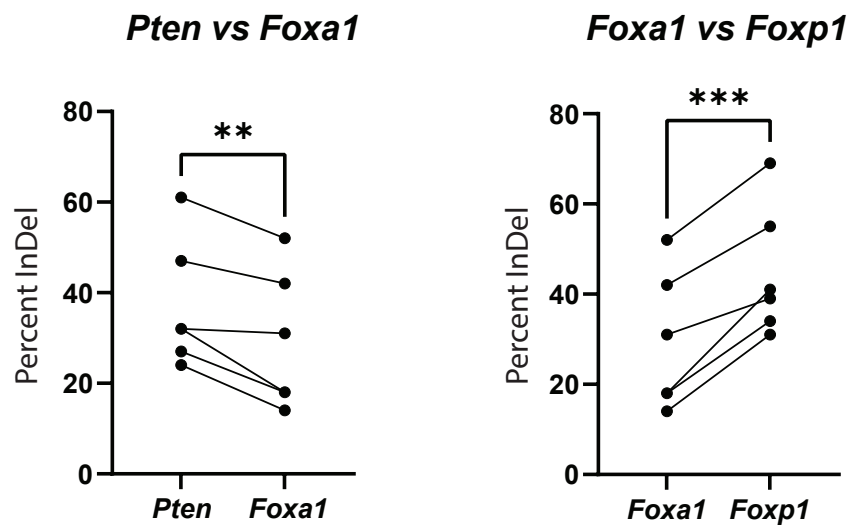

**Figure S6: Decreased mutations of Foxa1 compared to Pten and Foxp1**

Indel analysis for Pten, Foxa1 and Foxp1 in triple deficient samples (n=6, \*\* = p<0.01; \*\*\* = p<0.001).

Table S1 – oligoes

| Gene    | Forward primer        | Reverse primer         | Aim              |
|---------|-----------------------|------------------------|------------------|
| Pten    | CTCCCTGGAGTGAAGAGCAC  | GTGTGCCTAGCACCTACTCC   | Indel analysis   |
| Foxa1   | TCTGGGGCACACTACTAACC  | GATGTAGGAGTAAGGCGGCT   | Indel analysis   |
| Foxp1   | GCCAGTCTTTCCTCTGGGAC  | GCATGCTTGCATACTAAGTGGT | Indel analysis   |
| App     | TCCGAGAGGTGTGCTCTGAA  | CCACATCCGCCGTAAAAGAATG | qReal-Time PCR   |
| Klk4    | TTTCTGCTCGGGAGTCTTGG  | CTTTCAGGTTATGCAGGCC    | qReal-Time PCR   |
| Nkx3.1  | ATGCTTAGGGTAGCGGAGC   | TGCGGATTGCCTGAGTGTC    | qReal-Time PCR   |
| Tmprss2 | CAGTCTGAGCACATCTGTCCT | CTCGGAGCATACTGAGGCA    | qReal-Time PCR   |
| Rpl32   | GCCTCTGGTGAAGCCCAAG   | TTGTTGCTCCCATACCGATGT  | qReal-Time PCR   |
| Pten    | GCTTTACAGTGAATTGCTGC  | GCAGCAATTCAGTGTAAAGC   | Cas9 protospacer |
| Foxa1   | CGGGGTCATGTTGCCGCTCG  | CGAGCGGCAACATGACCCCG   | Cas9 protospacer |
| Foxp1   | ACACGGTGGGACCTATCCGC  | GCGGATAGGTCCCACCGTGT   | Cas9 protospacer |
